# Supplementary material for: Identification of an immune-related six-long noncoding RNA signature as a novel prognosis biomarker for adenocarcinoma of lung
Source: PubMed Central journal article supplement (PMC7791552; doi:10.1042/bsr20202444), 2021-01-07
Supplement: BSR-2020-2444_supp.pdf [file BSR-2020-2444_supp.pdf]

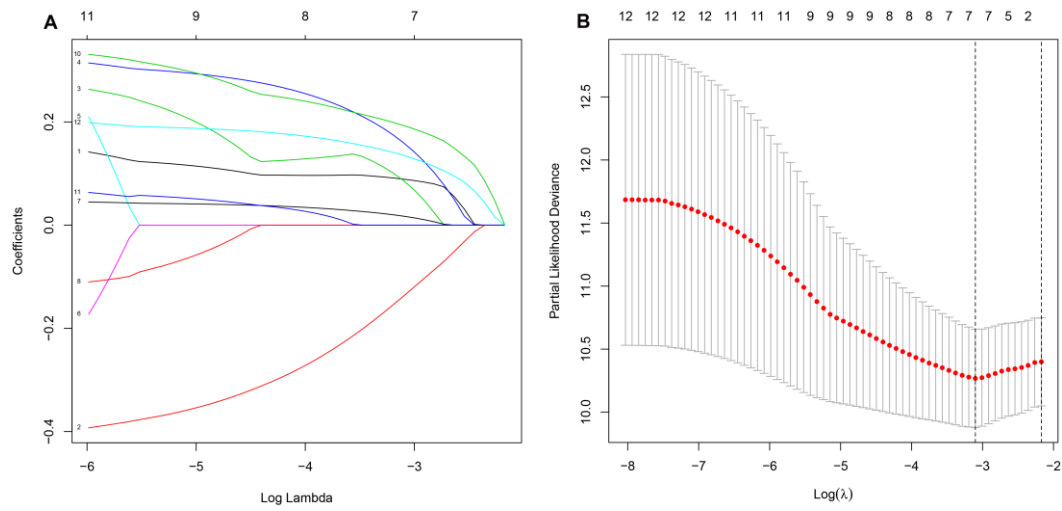

**Supplementary Figure 1. LASSO and likelihood deviance plot. LASSO coefficient profiles(A) and a partial likelihood deviance plot(B).**

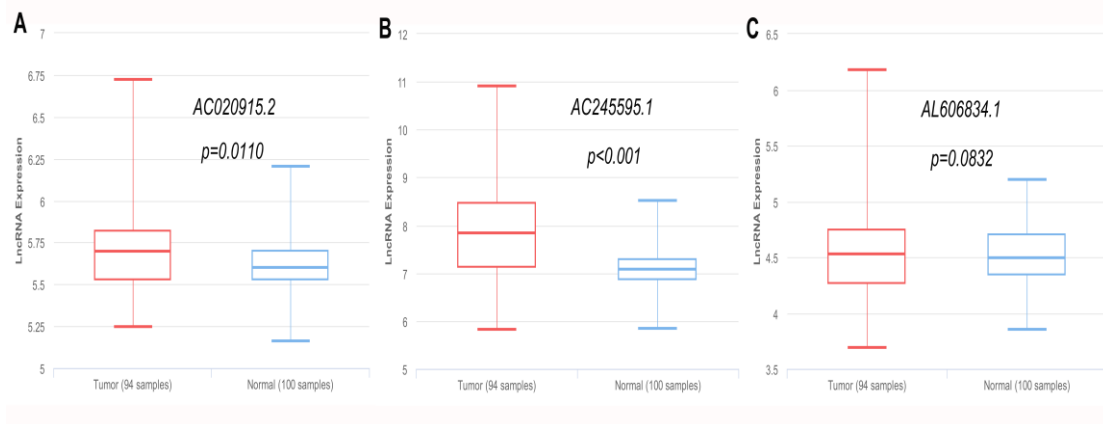

**Supplementary Figure 2. The expressions of lncRNAAC020915.2 (A), AC245595.1 (B), AL606834.1 (C) in LUAD patients by LnCAR database.**
